# Supplementary material
Source: PubMed Central journal article supplement (PMC4810648)
Supplement: JVI.02400-15_zjv999091433so1.pdf [file JVI.02400-15_zjv999091433so1.pdf]

1 **Supplementary Figures**  
2 **Figure S1.**

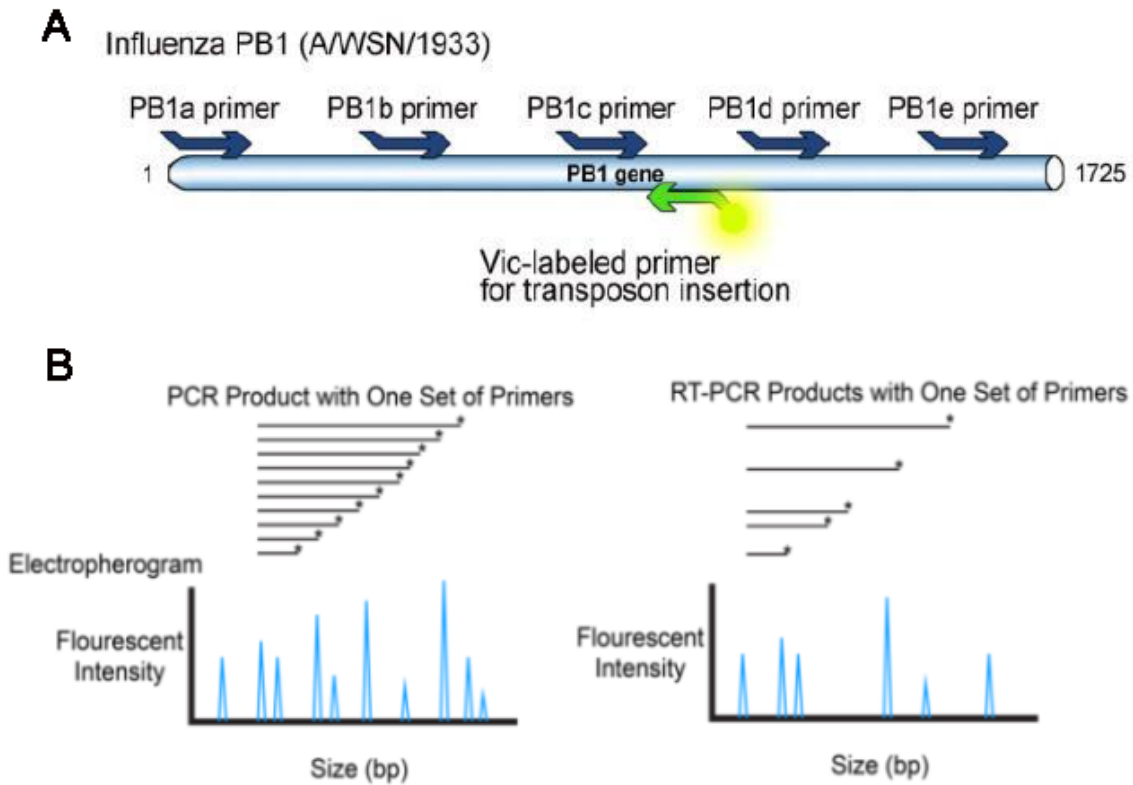

3  
4 **Figure S1. Genome-wide virus mutagenesis and data collection.** (A) Individual  
5 mutations are genotyped by PCR amplification with a gene-specific primer and a Vic-  
6 labeled primer against the 15nt insertion sequence. (B) The mutant pool library can be  
7 put through selection such as growth *in vitro* or *in vivo*. The selected pool is collected  
8 and genotyped. Essential and non-essential regions in the genome required for growth  
9 can be determined by comparing genotyping data from the unselected pool (total  
10 mutant library) and selected pool.

1 **Figure S2.**

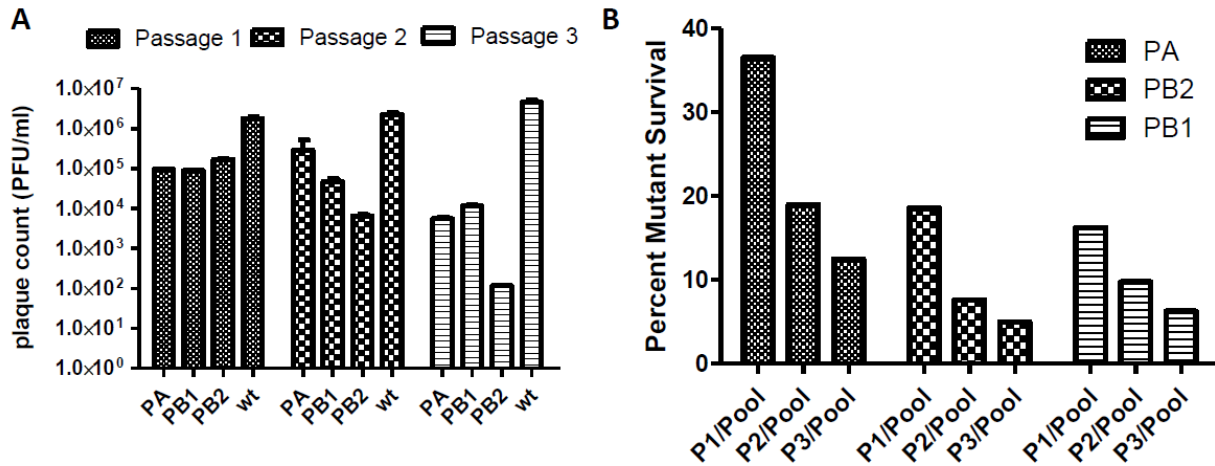

2

3 **Figure S2. Characterization of virus pool from each passage.** (A) The viral titer of  
4 WT and mutant pools at the indicated passage was measured by plaque assay using  
5 MDCK cells. (B) Total numbers of mutants detected in the initial PB1 mutant DNA library  
6 and recovered from the first three passages in MDCK cells after reconstitution of the  
7 influenza mutant pool.

8

1 **Figure S3.**

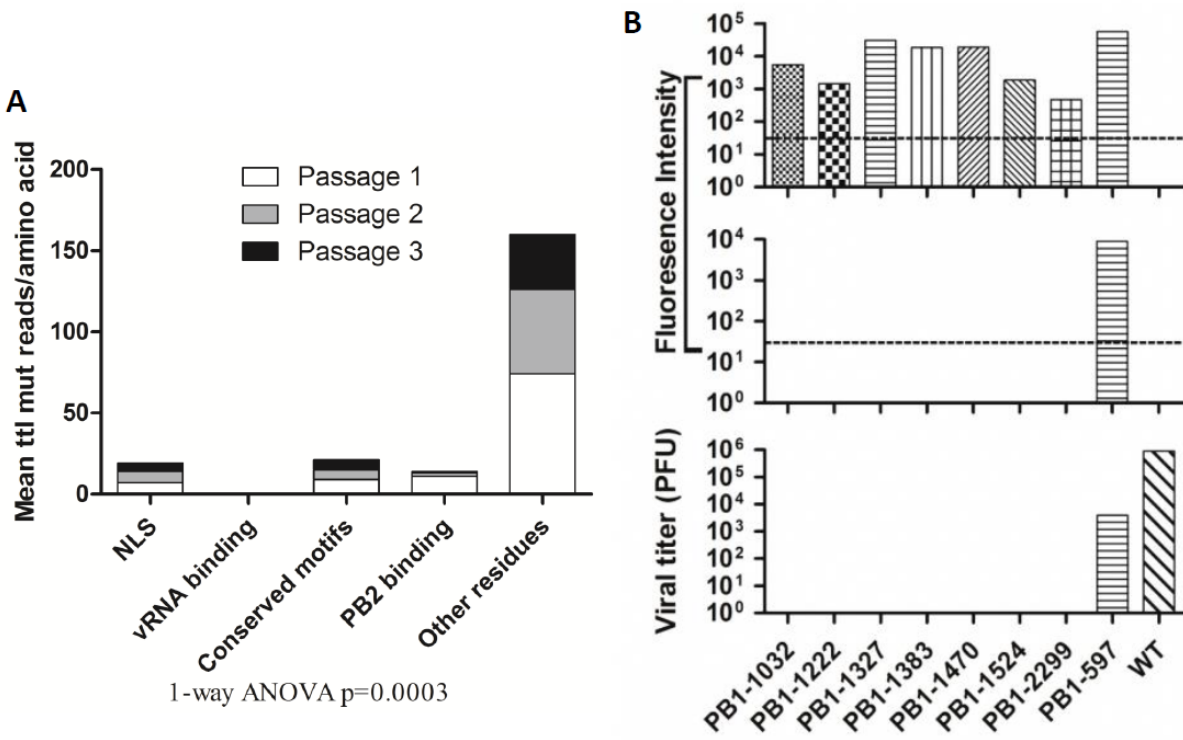

2

3 **Figure S3. Validation of genotyping data using isolated single clones.** (A) The  
 4 location of significant viable mutants at functional regions of the PB1 gene by amino  
 5 acid position. NLS, Nuclear Localization Signal. (B) To verify our mutagenesis, the  
 6 mutant PB1 plasmid library was co-transfected with 7 WT plasmids in 293T cells to  
 7 recover virus in passage 1. Eight randomly selected single clone mutants were isolated  
 8 from the plasmid pool and were co-transfected independently with 7 WT plasmids. The  
 9 graph indicates where single clone mutants and viruses from passage 1 were unable to  
 10 grow.

11

1 **Figure S4.**

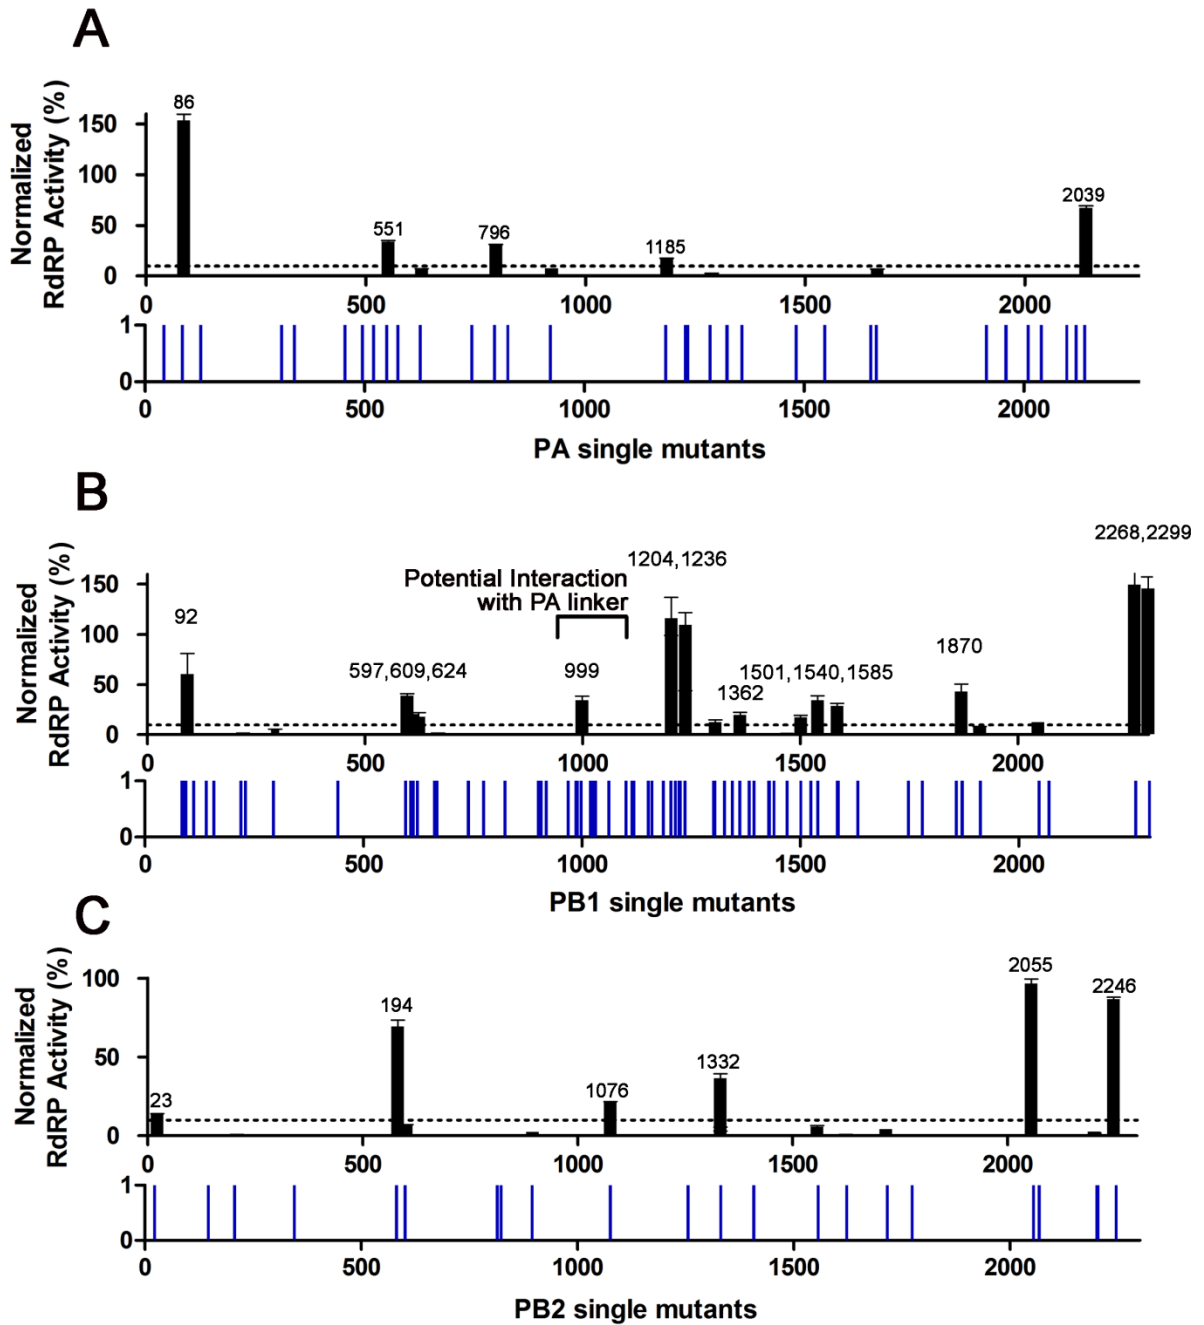

2

3 **Figure S4. Location and RdRP activity of all isolated single clones from PA, PB1**  
4 **and PB1 library.** The coverage and location of all single mutants from the PA (A), PB1  
5 (B) and PB2 (C) libraries shown in blue bars, whereas the relative polymerase activities  
6 are labeled in black bars.

1 **Figure S5.**

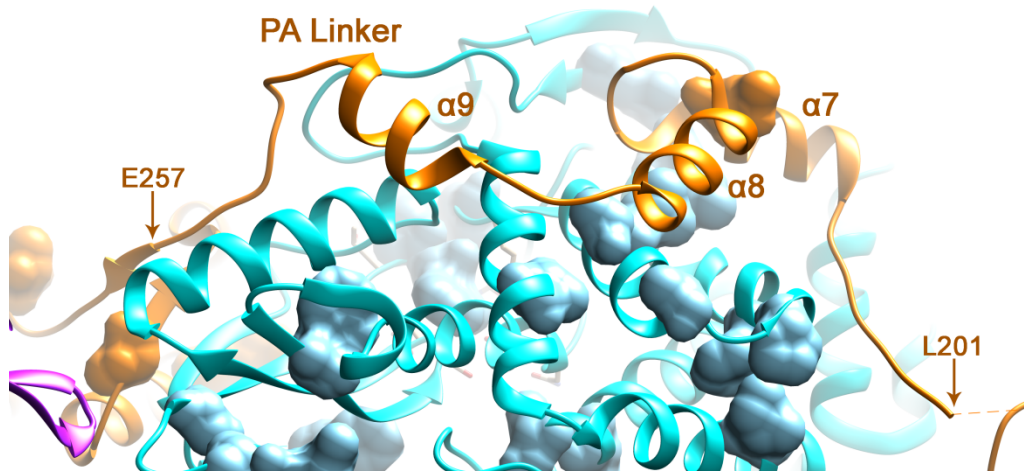

2

3 **Figure S5. Structure of the PA linker.** The PA linker that interacts with PB1 subunit is  
4 labeled in orange, whereas the PB1 interface is labeled in cyan. PB2 subunit is labeled  
5 in purple. Site 264 (green) was highlighted on the PA linker (blue). A charged amino  
6 acid tunnel surrounding the linker on PAc is shown in purple. PB1c and PAc are shown  
7 as transparent grey and orange surfaces, respectively.

8

1 **Figure S6.**

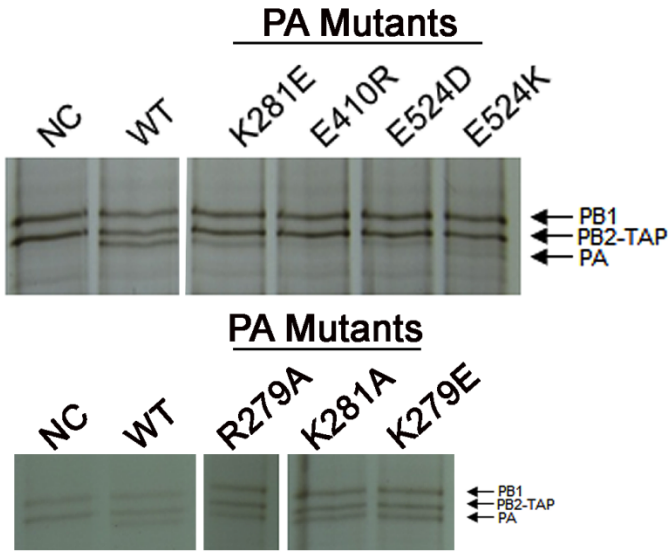

2

3 **Figure S6. TAP pull-down of influenza virus polymerase complex with PA mutants.**

4 PB2-TAP tagged heterotrimer polymerase complex was purified in 293T cells at 40  
5 hours after transfection. The positions of PA, PB-TAP and PB1 are indicated.

6

1 **Figure S7.**

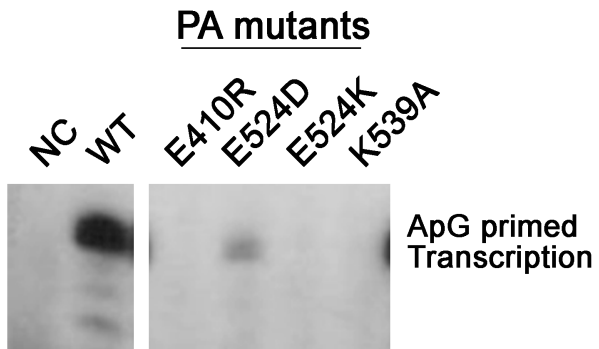

2

3 **Figure S7. ApG primed transcription assay.** *In vitro* ApG primed transcription  
4 assay of influenza virus polymerase with WT and indicated mutations on PA. The  
5 positions of transcription products are indicated.

**Table S1. Primers, nucleotide locations, and sequences.**

| <b>PA</b>   | <b>Primer Positions &amp; Sequence</b> |
|-------------|----------------------------------------|
| <b>13</b>   | ATTTGAATGGATGTCAATCC                   |
| <b>456</b>  | ACACAATAGAAGTGTTTCAG                   |
| <b>847</b>  | GATAAGGAAGATGATGACC                    |
| <b>1276</b> | AATCTTGGACAAAAGAGAC                    |
| <b>1687</b> | ATACAACATTAGAAATCTCC                   |
| <b>PB1</b>  | <b>Primer Positions &amp; Sequence</b> |
| <b>1</b>    | GAAGATTTTGTGCGACAATGC                  |
| <b>439</b>  | ATTCAGTGGGGAGGAAATGG                   |
| <b>861</b>  | TCCAAATTCCTGCTGATGG                    |
| <b>1278</b> | ATAGAGCTCGATGAGATTGG                   |
| <b>1799</b> | CCTATGTTCTTGTATGTGAGG                  |
| <b>PB2</b>  | <b>Primer Positions &amp; Sequence</b> |
| <b>85</b>   | ATGTCGCAGTCTCGCACTC                    |
| <b>383</b>  | AACCTTTGGCCCTGTCCATTTTA<br>G           |
| <b>739</b>  | GAGGGGAGGCGAGGAATG                     |
| <b>1094</b> | GGTTGGGAGAAGAGCAACAGC                  |
| <b>1449</b> | GGGGTAGATGAGTATTCCAGCG                 |
| <b>1876</b> | CAAAGCAAAGTGGAAATGCAGTT<br>CTC         |

**Table S2. Single mutants isolated from the PB1 pool.**

|           | <b>PB1</b> | <b>Nuc Pos</b> | <b>RdRP activity<sup>a</sup></b> | <b>Std Dev</b> | <b>Viral titer</b> | <b>Plaque size</b> | <b>Plaque Characteristic</b> | <b>AA Pos</b> |
|-----------|------------|----------------|----------------------------------|----------------|--------------------|--------------------|------------------------------|---------------|
| <b>1</b>  | PB1-wt     | 0              | 100                              | 19.147         | 4.67E+06           | Normal             | Clear                        | 0             |
| <b>2</b>  | PB1-240    | 85             | 0.01                             | 0.01           | None               | ND                 | ND                           | 28            |
| <b>3</b>  | PB1-241    | 85             | 0.01                             | 0.01           | None               | ND                 | ND                           | 28            |
| <b>4</b>  | PB1-242    | 92             | 60.391                           | 20.682         | 1.23E+05           | Normal             | Clear                        | 31            |
| <b>5</b>  | PB1-140    | 94             | 0                                | 0.01           | None               | ND                 | ND                           | 31            |
| <b>6</b>  | PB1-272    | 112            | 0                                | 0.01           | None               | ND                 | ND                           | 37            |
| <b>7</b>  | PB1-262    | 141            | 0.01                             | 0.01           | None               | ND                 | ND                           | 47            |
| <b>8</b>  | PB1-3      | 158            | 0                                | 0.01           | None               | ND                 | ND                           | 53            |
| <b>9</b>  | PB1-258    | 220            | 1.2042                           | 0.5247         | None               | ND                 | ND                           | 73            |
| <b>10</b> | PB1-222    | 230            | 0.1719                           | 0.0385         | None               | ND                 | ND                           | 77            |
| <b>11</b> | PB1-214    | 294            | 5.35                             | 0.09           | None               | ND                 | ND                           | 98            |
| <b>12</b> | PB1-8      | 442            | 0.0257                           | 0.0111         | None               | ND                 | ND                           | 147           |
| <b>13</b> | PB1-16     | 597            | 38.972                           | 2.1601         | 1.10E+03           | Small              | Clear                        | 199           |
| <b>14</b> | PB1-125    | 609            | 19.575                           | 0.4957         | None               | ND                 | ND                           | 203           |
| <b>15</b> | PB1-213    | 614            | 2.83                             | 0.02           | None               | ND                 | ND                           | 205           |
| <b>16</b> | PB1-157    | 624            | 17.98                            | 3.9762         | None               | ND                 | ND                           | 208           |
| <b>17</b> | PB1-209    | 663            | 0.01                             | 0.01           | None               | ND                 | ND                           | 221           |



|    |         |      |        |        |          |        |        |     |
|----|---------|------|--------|--------|----------|--------|--------|-----|
| 18 | PB1-27  | 668  | 1.2335 | 0.3948 | None     | ND     | ND     | 223 |
| 19 | PB1-56  | 740  | 0.16   | 0.01   | None     | ND     | ND     | 247 |
| 20 | PB1-34  | 740  | 0.13   | 0.00   | None     | ND     | ND     | 247 |
| 21 | PB1-6   | 741  | 0      | 0.01   | None     | ND     | ND     | 247 |
| 22 | PB1-275 | 775  | 0      | 0.00   | None     | ND     | ND     | 258 |
| 23 | PB1-221 | 824  | 0.02   | 0.00   | None     | ND     | ND     | 275 |
| 24 | PB1-25  | 901  | 0      | 0.01   | None     | ND     | ND     | 300 |
| 25 | PB1-235 | 907  | 0.81   | 0.00   | None     | ND     | ND     | 302 |
| 26 | PB1-38  | 919  | 0.22   | 0.00   | None     | ND     | ND     | 306 |
| 27 | PB1-154 | 969  | 0.01   | 0.00   | None     | ND     | ND     | 323 |
| 28 | PB1-236 | 987  | 0.01   | 0.01   | None     | ND     | ND     | 329 |
| 29 | PB1-263 | 987  | 0.01   | 0.00   | None     | ND     | ND     | 329 |
| 30 | PB1-233 | 990  | 0.02   | 0.01   | None     | ND     | ND     | 330 |
| 31 | PB1-232 | 999  | 34.26  | 4.28   | 8.65E+04 | Normal | Clear  | 333 |
| 32 | PB1-17  | 1020 | 0.11   | 0.01   | None     | ND     | ND     | 340 |
| 33 | PB1-135 | 1026 | 0.076  | 0.0171 | None     | ND     | ND     | 342 |
| 34 | PB1-144 | 1031 | 0.4445 | 0.1403 | None     | ND     | ND     | 344 |
| 35 | PB1-269 | 1031 | 0.02   | 0.01   | None     | ND     | ND     | 344 |
| 36 | PB1-101 | 1031 | 0.01   | 0.02   | None     | ND     | ND     | 344 |
| 37 | PB1-43  | 1032 | 0.15   | 0.00   | None     | ND     | ND     | 344 |
| 38 | PB1-238 | 1032 | 0.02   | 0.00   | None     | ND     | ND     | 344 |
| 39 | PB1-111 | 1062 | 0.18   | 0.03   | None     | ND     | ND     | 354 |
| 40 | PB1-279 | 1101 | 0.02   | 0.00   | None     | ND     | ND     | 367 |
| 41 | PB1-200 | 1115 | 0.01   | 0.01   | None     | ND     | ND     | 372 |
| 42 | PB1-250 | 1119 | 1.25   | 0.01   | None     | ND     | ND     | 373 |
| 43 | PB1-160 | 1152 | 0.12   | 0.00   | None     | ND     | ND     | 384 |
| 44 | PB1-100 | 1152 | 0.03   | 0.02   | None     | ND     | ND     | 384 |
| 45 | PB1-48  | 1160 | 0.1115 | 0.0155 | None     | ND     | ND     | 387 |
| 46 | PB1-252 | 1186 | 0.03   | 0.00   | None     | ND     | ND     | 395 |
| 47 | PB1-47  | 1204 | 116.04 | 20.999 | 5.10E+03 | Normal | Clear  | 401 |
| 48 | PB1-103 | 1204 | 92.04  | 6.79   | 8.70E+04 | Normal | Clear  | 401 |
| 49 | PB1-270 | 1214 | 0      | 0.01   | None     | ND     | ND     | 405 |
| 50 | PB1-168 | 1222 | 0.01   | 0.01   | None     | ND     | ND     | 407 |
| 51 | PB1-15  | 1225 | 0.13   | 0.02   | None     | ND     | ND     | 408 |
| 52 | PB1-113 | 1236 | 109.56 | 12.096 | 7.50E+05 | Normal | Clear  | 412 |
| 53 | PB1-205 | 1236 | 39.74  | 4.28   | 2.22E+05 | Normal | Clear  | 412 |
| 54 | PB1-248 | 1236 | 0      | 0.01   | None     | ND     | ND     | 412 |
| 55 | PB1-57  | 1302 | 0.23   | 0.01   | None     | ND     | ND     | 434 |
| 56 | PB1-152 | 1305 | 12.69  | 2.28   | 1.70E+03 | Small  | Turbid | 435 |
| 57 | PB1-259 | 1327 | 0.01   | 0.01   | None     | ND     | ND     | 442 |
| 58 | PB1-261 | 1345 | 0.01   | 0.01   | None     | ND     | ND     | 448 |
| 59 | PB1-153 | 1362 | 19.61  | 2.7679 | None     | ND     | ND     | 454 |
| 60 | PB1-245 | 1383 | 0      | 0.01   | None     | ND     | ND     | 461 |
| 61 | PB1-150 | 1394 | 0.0507 | 0.0056 | None     | ND     | ND     | 465 |
| 62 | PB1-11  | 1428 | 0.24   | 0.02   | None     | ND     | ND     | 476 |
| 63 | PB1-266 | 1428 | 0      | 0.00   | None     | ND     | ND     | 476 |
| 64 | PB1-20  | 1429 | 0      | 0.00   | None     | ND     | ND     | 476 |
| 65 | PB1-134 | 1440 | 0.19   | 0.02   | None     | ND     | ND     | 480 |
| 66 | PB1-122 | 1440 | 0.04   | 0.02   | None     | ND     | ND     | 480 |
| 67 | PB1-230 | 1470 | 1.99   | 0.01   | None     | ND     | ND     | 490 |

|    |         |      |        |        |          |        |        |     |
|----|---------|------|--------|--------|----------|--------|--------|-----|
| 68 | PB1-120 | 1470 | 0.01   | 0.01   | None     | ND     | ND     | 490 |
| 69 | PB1-161 | 1470 | 0      | 0.00   | None     | ND     | ND     | 490 |
| 70 | PB1-202 | 1501 | 17.57  | 1.67   | 9.69E+03 | Small  | Turbid | 500 |
| 71 | PB1-104 | 1524 | 0.13   | 0.02   | None     | ND     | ND     | 508 |
| 72 | PB1-215 | 1540 | 34.46  | 4.50   | 1.12E+05 | Normal | Clear  | 513 |
| 73 | PB1-247 | 1585 | 28.94  | 2.29   | 1.90E+03 | Normal | Clear  | 528 |
| 74 | PB1-142 | 1587 | 0.12   | 0.00   | None     | ND     | ND     | 529 |
| 75 | PB1-41  | 1631 | 0.15   | 0.01   | None     | ND     | ND     | 544 |
| 76 | PB1-163 | 1631 | 0.01   | 0.00   | None     | ND     | ND     | 544 |
| 77 | PB1-21  | 1632 | 0.09   | 0.00   | None     | ND     | ND     | 544 |
| 78 | PB1-278 | 1748 | 0      | 0.00   | None     | ND     | ND     | 583 |
| 79 | PB1-166 | 1779 | 0.01   | 0.00   | None     | ND     | ND     | 593 |
| 80 | PB1-121 | 1857 | 0.01   | 0.01   | None     | ND     | ND     | 619 |
| 81 | PB1-9   | 1870 | 43.06  | 7.3892 | 9.80E+04 | Normal | Clear  | 623 |
| 82 | PB1-223 | 1871 | 0.01   | 0.01   | None     | ND     | ND     | 624 |
| 83 | PB1-237 | 1871 | 0.01   | 0.01   | None     | ND     | ND     | 624 |
| 84 | PB1-264 | 1912 | 7.3321 | 1.0362 | None     | ND     | ND     | 637 |
| 85 | PB1-139 | 2046 | 12.58  | 0.02   | 9.31E+02 | Small  | Turbid | 682 |
| 86 | PB1-159 | 2069 | 0.38   | 0.01   | None     | ND     | ND     | 690 |
| 87 | PB1-148 | 2268 | 163.45 | 30.068 | None     | ND     | ND     | 756 |
| 88 | PB1-137 | 2299 | 145.75 | 11.779 | None*    | Small  | Turbid | 766 |

Nuc Pos is abbreviated for the location of the insertion in nucleotide position. Std Dev is abbreviated for standard deviation of the RdRp activity. AA pos is abbreviated for the location of the insertion in amino acid position. <sup>a</sup>Relative polymerase activity, which was normalized against WT.

**Table S3. Single mutants isolated from the PB2 pool.**

|    | PB2     | Nuc Pos | Std Dev | RdRP activity <sup>a</sup> | AA pos |
|----|---------|---------|---------|----------------------------|--------|
| 1  | PB2-wt  | 0       | 1.00    | 100.00                     | 0      |
| 2  | PB2-17  | 23      | 0.34    | 13.86                      | 8      |
| 3  | PB2-145 | 147     | 0.05    | 1.04                       | 49     |
| 4  | PB2-2   | 147     | 0.05    | 0.76                       | 49     |
| 5  | PB2-112 | 208     | 0.06    | 0.83                       | 69     |
| 6  | PB2-66  | 346     | 0.01    | 0.67                       | 115    |
| 7  | PB2-125 | 582     | 4.13    | 69.43                      | 194    |
| 8  | PB2-59  | 602     | 0.11    | 6.85                       | 201    |
| 9  | PB2-79  | 815     | 0.02    | 0.32                       | 272    |
| 10 | PB2-95  | 824     | 0.05    | 0.55                       | 275    |
| 11 | PB2-52  | 824     | 0.09    | 0.40                       | 275    |
| 12 | PB2-84  | 824     | 0.01    | 0.28                       | 275    |
| 13 | PB2-157 | 896     | 0.11    | 2.59                       | 299    |
| 14 | PB2-4   | 1076    | 0.43    | 21.32                      | 359    |
| 15 | PB2-173 | 1200    | 0.00    | 0.01                       | 400    |
| 16 | PB2-22  | 1256    | 0.06    | 1.05                       | 419    |
| 17 | PB2-87  | 1332    | 3.08    | 36.43                      | 444    |
| 18 | PB2-158 | 1332    | 0.35    | 5.20                       | 444    |

|           |                |      |      |       |     |
|-----------|----------------|------|------|-------|-----|
| <b>19</b> | <b>PB2-123</b> | 1332 | 0.29 | 2.60  | 444 |
| <b>20</b> | <b>PB2-72</b>  | 1408 | 0.01 | 0.37  | 469 |
| <b>21</b> | <b>PB2-65</b>  | 1557 | 0.47 | 5.99  | 519 |
| <b>22</b> | <b>PB2-47</b>  | 1557 | 0.00 | 0.44  | 519 |
| <b>23</b> | <b>PB2-122</b> | 1623 | 0.18 | 0.68  | 541 |
| <b>24</b> | <b>PB2-40</b>  | 1717 | 0.03 | 4.28  | 572 |
| <b>25</b> | <b>PB2-32</b>  | 1774 | 0.00 | 0.02  | 591 |
| <b>26</b> | <b>PB2-70</b>  | 2055 | 2.85 | 96.71 | 685 |
| <b>27</b> | <b>PB2-42</b>  | 2068 | 0.00 | 0.24  | 689 |
| <b>28</b> | <b>PB2-131</b> | 2201 | 0.02 | 2.82  | 734 |
| <b>29</b> | <b>PB2-46</b>  | 2204 | 0.02 | 2.27  | 735 |
| <b>30</b> | <b>PB2-15</b>  | 2246 | 1.12 | 86.85 | 749 |

Nuc Pos is abbreviated for the location of the insertion in nucleotide positions. Std Dev is abbreviated for standard deviation of the RdRp activity. AA pos is abbreviated for the location of the insertion in amino acid positions.<sup>1</sup>Relative polymerase activity, which was normalized against WT.

**Table S4. Single mutants isolated from the PA pool.**

|           | <b>PA</b>     | <b>Nuc Pos</b> | <b>Std Dev</b> | <b>RdRP activity<sup>a</sup></b> | <b>AA pos</b> |
|-----------|---------------|----------------|----------------|----------------------------------|---------------|
| <b>1</b>  | <b>PA-wt</b>  | 0              | 1              | 100                              | 0             |
| <b>2</b>  | <b>PA-84</b>  | 44             | 0.00           | 0.01                             | 15            |
| <b>3</b>  | <b>PA-83</b>  | 86             | 5.90           | 168.06                           | 29            |
| <b>4</b>  | <b>PA-49</b>  | 128            | 0.02           | 0.52                             | 43            |
| <b>5</b>  | <b>PA-76</b>  | 311            | 0.00           | 0.06                             | 104           |
| <b>6</b>  | <b>PA-100</b> | 340            | 0.00           | 0.01                             | 113           |
| <b>7</b>  | <b>PA-89</b>  | 456            | 0.00           | 0.02                             | 152           |
| <b>8</b>  | <b>PA-2</b>   | 495            | 0.00           | 0.02                             | 165           |
| <b>9</b>  | <b>PA-12</b>  | 521            | 0.00           | 0.02                             | 174           |
| <b>10</b> | <b>PA-7</b>   | 551            | 0.88           | 34.10                            | 184           |
| <b>11</b> | <b>PA-51</b>  | 576            | 0.07           | 0.77                             | 192           |
| <b>12</b> | <b>PA-88</b>  | 627            | 0.39           | 6.79                             | 209           |
| <b>13</b> | <b>PA-35</b>  | 796            | 0.68           | 30.49                            | 265           |
| <b>14</b> | <b>PA-103</b> | 923            | 0.11           | 7.35                             | 308           |
| <b>16</b> | <b>PA-31</b>  | 1185           | 0.87           | 16.84                            | 395           |
| <b>17</b> | <b>PA-92</b>  | 1230           | 0.00           | 0.01                             | 410           |
| <b>18</b> | <b>PA-94</b>  | 1235           | 0.00           | 0.02                             | 412           |
| <b>19</b> | <b>PA-26</b>  | 1287           | 0.21           | 2.28                             | 429           |
| <b>20</b> | <b>PA-75</b>  | 1325           | 0.01           | 0.02                             | 442           |
| <b>21</b> | <b>PA-72</b>  | 1359           | 0.00           | 0.01                             | 453           |
| <b>22</b> | <b>PA-17</b>  | 1482           | 0.00           | 0.04                             | 494           |
| <b>23</b> | <b>PA-24</b>  | 1482           | 0.04           | 0.84                             | 494           |
| <b>24</b> | <b>PA-68</b>  | 1547           | 0.00           | 0.01                             | 516           |
| <b>25</b> | <b>PA-87</b>  | 1651           | 0.11           | 1.67                             | 550           |
| <b>26</b> | <b>PA-96</b>  | 1664           | 0.31           | 6.54                             | 555           |
| <b>27</b> | <b>PA-52</b>  | 1915           | 0.00           | 0.02                             | 638           |
| <b>28</b> | <b>PA-20</b>  | 1959           | 0.00           | 0.01                             | 653           |

|           |              |      |      |       |     |
|-----------|--------------|------|------|-------|-----|
| <b>29</b> | <b>PA-50</b> | 1960 | 0.01 | 0.06  | 653 |
| <b>30</b> | <b>PA-48</b> | 2010 | 0.00 | 0.03  | 670 |
| <b>31</b> | <b>PA-65</b> | 2040 | 0.00 | 0.01  | 680 |
| <b>32</b> | <b>PA-54</b> | 2098 | 0.00 | 0.01  | 699 |
| <b>33</b> | <b>PA-59</b> | 2119 | 0.00 | 0.02  | 706 |
| <b>34</b> | <b>PA-23</b> | 2139 | 1.86 | 67.47 | 713 |

Nuc Pos is abbreviated for the location of the insertion in nucleotide positions. Std Dev is abbreviated for standard deviation of the RdRp activity. AA pos is abbreviated for the location of the insertion in amino acid positions. <sup>a</sup>Relative polymerase activity, which was normalized against WT.

**Table S5. Viable PB1, PB2 and PA mutant viruses in 3 passages.**

| <b>PB1</b>        |                   |                   | <b>PA</b>         |                   |                   | <b>PB2</b>        |                   |                   |
|-------------------|-------------------|-------------------|-------------------|-------------------|-------------------|-------------------|-------------------|-------------------|
| <b>Passag e 1</b> | <b>Passag e 2</b> | <b>Passag e 3</b> | <b>Passag e 1</b> | <b>Passag e 2</b> | <b>Passag e 3</b> | <b>Passag e 1</b> | <b>Passag e 2</b> | <b>Passag e 3</b> |
| 82                | 82                | 82                | 89                | 100               | 100               | 155               | 162               | 158               |
| 89                | 89                | 89                | 100               | 101               | 101               | 161               | 164               | 162               |
| 157               | 157               | 194               | 101               | 119               | 119               | 189               | 182               | 165               |
| 164               | 190               | 277               | 119               | 126               | 126               | 259               | 183               | 169               |
| 169               | 194               | 334               | 126               | 135               | 135               | 358               | 185               | 180               |
| 190               | 277               | 534               | 135               | 145               | 145               | 363               | 186               | 181               |
| 194               | 334               | 542               | 143               | 146               | 146               | 364               | 188               | 189               |
| 199               | 534               | 569               | 144               | 149               | 161               | 414               | 194               | 460               |
| 200               | 542               | 588               | 146               | 161               | 180               | 415               | 219               | 463               |
| 277               | 550               | 599               | 149               | 242               | 235               | 446               | 220               | 487               |
| 317               | 569               | 602               | 161               | 299               | 240               | 456               | 222               | 488               |
| 334               | 588               | 611               | 175               | 345               | 269               | 459               | 291               | 489               |
| 341               | 597               | 618               | 177               | 349               | 298               | 463               | 293               | 602               |
| 349               | 599               | 629               | 180               | 351               | 335               | 479               | 359               | 676               |
| 359               | 602               | 669               | 181               | 359               | 346               | 480               | 361               | 759               |
| 382               | 609               | 672               | 240               | 361               | 358               | 487               | 362               | 768               |
| 534               | 611               | 693               | 241               | 393               | 360               | 488               | 397               | 818               |
| 542               | 618               | 781               | 242               | 415               | 361               | 510               | 452               | 823               |
| 550               | 622               | 789               | 265               | 513               | 390               | 512               | 453               | 824               |
| 569               | 626               | 875               | 298               | 549               | 415               | 603               | 457               | 937               |
| 588               | 629               | 880               | 299               | 552               | 448               | 676               | 459               | 975               |
| 599               | 669               | 897               | 304               | 569               | 453               | 721               | 486               | 1198              |
| 602               | 672               | 925               | 312               | 595               | 513               | 762               | 487               | 1311              |
| 609               | 693               | 927               | 315               | 646               | 552               | 810               | 510               | 1425              |
| 611               | 771               | 934               | 335               | 647               | 595               | 818               | 512               | 1528              |

---

|      |      |      |     |      |      |      |      |      |
|------|------|------|-----|------|------|------|------|------|
| 618  | 781  | 958  | 345 | 648  | 647  | 826  | 602  | 1552 |
| 622  | 789  | 961  | 356 | 649  | 792  | 839  | 818  | 1553 |
| 626  | 875  | 980  | 358 | 695  | 914  | 844  | 818  | 1607 |
| 629  | 880  | 989  | 359 | 789  | 918  | 846  | 826  | 1608 |
| 659  | 897  | 1026 | 361 | 794  | 966  | 859  | 843  | 1669 |
| 669  | 925  | 1037 | 368 | 914  | 971  | 866  | 877  | 1742 |
| 672  | 927  | 1050 | 393 | 917  | 980  | 869  | 935  | 1743 |
| 693  | 934  | 1117 | 395 | 918  | 1031 | 875  | 962  | 1979 |
| 771  | 948  | 1123 | 415 | 951  | 1032 | 877  | 1002 | 1980 |
| 781  | 958  | 1134 | 416 | 959  | 1067 | 879  | 1053 | 1993 |
| 782  | 961  | 1171 | 417 | 966  | 1073 | 889  | 1060 | 2093 |
| 789  | 980  | 1179 | 447 | 971  | 1075 | 894  | 1061 |      |
| 875  | 984  | 1313 | 475 | 980  | 1075 | 898  | 1080 |      |
| 880  | 989  | 1472 | 476 | 1030 | 1077 | 906  | 1085 |      |
| 897  | 993  | 1476 | 513 | 1031 | 1077 | 917  | 1135 |      |
| 925  | 999  | 1637 | 527 | 1032 | 1084 | 925  | 1172 |      |
| 927  | 1026 | 1708 | 529 | 1035 | 1085 | 928  | 1240 |      |
| 934  | 1037 | 1752 | 575 | 1046 | 1086 | 935  | 1272 |      |
| 948  | 1050 | 1864 | 595 | 1067 | 1088 | 946  | 1339 |      |
| 958  | 1076 | 1931 | 640 | 1072 | 1181 | 950  | 1528 |      |
| 961  | 1084 | 2066 | 642 | 1074 | 1183 | 962  | 1552 |      |
| 980  | 1102 |      | 646 | 1074 | 1306 | 978  | 1669 |      |
| 984  | 1108 |      | 647 | 1075 | 1402 | 1002 | 1846 |      |
| 989  | 1117 |      | 648 | 1077 | 1442 | 1019 | 1979 |      |
| 993  | 1123 |      | 649 | 1077 | 1500 | 1020 | 1983 |      |
| 1026 | 1134 |      | 675 | 1083 | 1503 | 1050 | 1993 |      |
| 1037 | 1168 |      | 683 | 1085 | 1512 | 1076 | 1994 |      |
| 1050 | 1171 |      | 683 | 1085 | 1514 | 1090 | 2059 |      |
| 1076 | 1179 |      | 686 | 1086 | 1610 | 1096 | 2069 |      |
| 1084 | 1189 |      | 687 | 1087 | 1649 | 1105 | 2097 |      |
| 1102 | 1313 |      | 694 | 1088 | 1650 | 1122 |      |      |
| 1108 | 1472 |      | 695 | 1109 | 1753 | 1144 |      |      |
| 1117 | 1476 |      | 697 | 1110 | 1757 | 1185 |      |      |
| 1123 | 1510 |      | 715 | 1160 | 1759 | 1207 |      |      |
| 1134 | 1637 |      | 737 | 1166 | 1763 |      |      |      |
| 1168 | 1708 |      | 771 | 1273 | 1791 | 1216 |      |      |
| 1171 | 1726 |      | 773 | 1306 | 1822 | 1225 |      |      |
| 1179 | 1752 |      | 781 | 1312 | 1825 | 1227 |      |      |
| 1189 | 1864 |      | 822 | 1347 | 1845 | 1228 |      |      |
| 1313 | 1931 |      | 886 | 1379 | 1873 | 1232 |      |      |
| 1332 | 2036 |      | 899 | 1390 | 1913 | 1237 |      |      |

---

---

|      |      |      |      |      |      |
|------|------|------|------|------|------|
| 1353 | 2066 | 914  | 1394 | 1916 | 1243 |
| 1357 |      | 917  | 1400 | 1920 | 1247 |
| 1472 |      | 918  | 1402 | 1924 | 1267 |
| 1476 |      | 926  | 1403 | 1926 | 1284 |
| 1481 |      | 953  | 1404 | 1927 | 1291 |
| 1486 |      | 955  | 1408 | 1929 | 1299 |
| 1507 |      | 965  | 1442 | 1929 | 1312 |
| 1510 |      | 966  | 1443 | 1978 | 1314 |
| 1636 |      | 970  | 1460 | 2020 | 1323 |
| 1637 |      | 971  | 1462 | 2070 | 1329 |
| 1708 |      | 973  | 1494 |      | 1333 |
| 1726 |      | 980  | 1495 |      | 1351 |
| 1728 |      | 986  | 1503 |      | 1358 |
| 1752 |      | 1007 | 1503 |      | 1360 |
| 1830 |      | 1028 | 1506 |      | 1362 |
| 1851 |      | 1028 | 1514 |      | 1367 |
| 1864 |      | 1030 | 1515 |      | 1383 |
| 1874 |      | 1031 | 1517 |      | 1384 |
| 1894 |      | 1032 | 1524 |      | 1392 |
| 1915 |      | 1045 | 1548 |      | 1395 |
| 1927 |      | 1046 | 1565 |      | 1404 |
| 1931 |      | 1047 | 1566 |      | 1421 |
| 1938 |      | 1056 | 1609 |      | 1428 |
| 2021 |      | 1057 | 1622 |      | 1431 |
| 2036 |      | 1063 | 1632 |      | 1457 |
| 2041 |      | 1064 | 1633 |      | 1462 |
| 2058 |      | 1066 | 1644 |      | 1463 |
| 2066 |      | 1066 | 1647 |      | 1477 |
| 2077 |      | 1070 | 1648 |      | 1493 |
| 2119 |      | 1071 | 1649 |      | 1496 |
| 2143 |      | 1072 | 1650 |      | 1498 |
| 2209 |      | 1073 | 1669 |      | 1502 |
| 2230 |      | 1074 | 1670 |      | 1505 |
| 2232 |      | 1075 | 1753 |      | 1515 |
| 2265 |      | 1076 | 1773 |      | 1524 |
|      |      | 1077 | 1791 |      | 1525 |
|      |      | 1081 | 1792 |      | 1527 |
|      |      | 1082 | 1804 |      | 1552 |
|      |      | 1083 | 1822 |      | 1567 |
|      |      | 1084 | 1825 |      | 1635 |
|      |      | 1085 | 1830 |      | 1657 |

---

---

|      |      |      |
|------|------|------|
| 1086 | 1842 | 1657 |
| 1087 | 1844 | 1668 |
| 1088 | 1845 | 1675 |
| 1110 | 1853 | 1676 |
| 1110 | 1855 | 1678 |
| 1160 | 1928 | 1702 |
| 1166 | 1932 | 1720 |
| 1181 | 1961 | 1720 |
| 1205 | 1978 | 1728 |
| 1208 | 1985 | 1811 |
| 1273 | 1998 | 1916 |
| 1287 | 2006 | 1918 |
| 1306 | 2009 | 1919 |
| 1311 | 2070 | 1923 |
| 1362 |      | 1946 |
| 1364 |      | 1967 |
| 1364 |      | 1971 |
| 1376 |      | 1980 |
| 1378 |      | 1994 |
| 1378 |      | 2050 |
| 1380 |      | 2058 |
| 1395 |      | 2059 |
| 1400 |      | 2096 |
| 1401 |      | 2128 |
| 1402 |      | 2135 |
| 1403 |      | 2214 |
| 1403 |      | 2219 |
| 1405 |      |      |
| 1408 |      |      |
| 1409 |      |      |
| 1415 |      |      |
| 1416 |      |      |
| 1421 |      |      |
| 1422 |      |      |
| 1430 |      |      |
| 1432 |      |      |
| 1439 |      |      |
| 1440 |      |      |
| 1441 |      |      |
| 1442 |      |      |
| 1443 |      |      |

---

---

1488

1492

1494

1495

1523

1524

1525

1546

1547

1548

1549

1554

1555

1564

1565

1566

1571

1572

1583

1584

1600

1601

1610

1622

1623

1632

1633

1645

1645

1647

1647

1648

1649

1650

1657

1659

1660

1669

1670

1715

1716

---



---

1753

1754

1778

1787

1791

1801

1804

1806

1813

1819

1821

1822

1824

1825

1828

1830

1837

1842

1844

1845

1846

1855

1904

1905

1908

1918

1920

1927

1929

1929

1932

1958

1960

1961

1962

1964

1965

1975

1977

1978

1979

---

---

1980  
1982  
1983  
1985  
1997  
1998  
2002  
2009  
2019  
2021  
2026  
2030  
2038  
2039  
2057  
2063  
2064  
2067  
2069  
2070

---
